# Supplementary material for: Subtotal gastrectomy pancreaticoduodenectomy versus conventional pancreaticoduodenectomy in the incidence of delayed gastric emptying: single-center retrospective cohort study
Source: Research Square preprint supplement (doi:10.21203/rs.3.rs-1948098/v1), 2022-08-18
Supplement: Supplementary file 1 [file b68ffdb2b9efb335bb0ba7f4.xlsx]

## Sheet: DATA
Number	Subtotal Gastrectomy PD	Age (yr)	Sex	Jaundice	Diabetes	Hypertension	Coronary atherosclerotic heart disease	History of Abdominal Surgery	BMI (kg/m2)	ALT/AST Elevation	ASA classification	Site of lesion	Operative time (min)	Blood Loss (ml)	Postoperative pancreatic fistula (B/C)	Delayed gastric emptying (B/C)	Biliary fistula	Gastrointestinal bleeding	Intra-abdominal bleeding	Abdominal infection	Postoperative hospital stay (d)	In-hospital death	Cause of death
1	No	62	male	Yes	No	No	No	Yes	22.6	Yes	2	bile duct	360	400	No	No	No	No	No	No	14	No
2	No	81	male	Yes	No	No	No	No	18.2	Yes	2	pancreas	525	650	No	No	No	No	No	Yes	31	No
3	No	60	male	Yes	No	No	No	Yes	26.6	Yes	2	pancreas	465	1200	No	Yes	No	No	No	No	25	No
4	No	51	female	No	No	No	No	No	20.8	No	1	pancreas	510	250	No	No	No	No	No	No	14	No
5	Yes	55	female	No	No	No	No	Yes	24.4	Yes	2	bile duct	365	700	No	No	No	No	No	No	13	No
6	No	70	female	No	No	Yes	No	No	29.3	No	2	bile duct	405	700	No	No	No	No	No	No	26	No
7	No	67	male	Yes	No	No	No	Yes	21.5	Yes	2	duodenum	375	300	Yes	Yes	No	No	No	No	44	No
8	Yes	71	male	No	No	No	No	No	26.1	No	2	bile duct	425	400	No	No	No	No	No	No	10	No
9	No	69	male	Yes	No	Yes	No	No	22.9	Yes	2	bile duct	480	1500	Yes	No	No	No	No	No	35	No
10	Yes	57	female	Yes	No	No	No	No	19.3	Yes	1	pancreas	440	600	No	No	No	No	No	No	15	No
11	No	68	female	No	No	No	No	No	20.8	No	2	duodenum	360	200	No	No	No	No	No	No	18	No
12	Yes	61	female	No	Yes	Yes	No	No	27.5	No	2	pancreas	425	1200	No	No	No	No	No	No	14	No
13	No	62	female	Yes	Yes	No	No	No	27.2	Yes	2	pancreas	510	600	No	No	No	No	No	No	14	No
14	No	67	male	Yes	Yes	No	No	No	27	Yes	3	duodenum	375	1000	No	No	No	No	No	No	20	No
15	Yes	70	male	No	No	No	No	No	28.7	No	2	duodenum	380	400	No	No	No	No	No	No	13	No
16	No	70	male	No	No	Yes	No	No	23	Yes	2	bile duct	450	800	No	No	No	No	No	No	19	No
17	Yes	49	male	No	No	No	No	No	27.7	No	2	duodenum	380	700	No	No	No	No	No	No	15	No
18	No	59	female	Yes	No	No	No	No	27.7	Yes	2	bile duct	315	300	Yes	Yes	No	No	No	Yes	70	No
19	No	69	female	Yes	No	No	No	No	19.7	Yes	2	bile duct	300	700	No	No	No	No	No	No	21	No
20	No	69	male	Yes	No	Yes	No	No	20.8	No	2	bile duct	360	800	No	No	No	No	No	No	13	No
21	No	41	male	No	No	No	No	No	21.3	No	3	duodenum	360	600	No	No	No	No	No	No	17	No
22	No	61	male	No	No	No	No	No	22.5	No	2	pancreas	510	350	No	No	No	Yes	No	No	26	No
23	Yes	78	female	No	No	Yes	No	No	22.4	No	2	duodenum	350	400	No	No	No	No	No	No	10	No
24	No	65	male	Yes	No	No	No	No	38.4	Yes	1	bile duct	390	800	Yes	No	No	Yes	No	No	28	No
25	No	65	male	No	No	No	No	No	19.8	No	1	duodenum	375	2000	No	No	No	No	No	No	10	No
26	No	57	male	Yes	No	No	No	No	22.7	Yes	2	pancreas	420	1000	No	No	No	No	No	No	11	No
27	No	67	female	Yes	No	No	No	No	27.2	Yes	2	bile duct	450	1000	No	No	No	No	No	No	15	No
28	Yes	52	male	Yes	No	No	No	No	21.5	Yes	2	bile duct	365	400	No	No	No	No	No	No	12	No
29	No	72	male	Yes	No	No	No	No	21.8	Yes	1	bile duct	345	400	No	No	No	No	No	No	25	No
30	No	61	male	No	No	No	No	No	21.1	No	1	duodenum	330	600	No	No	No	No	No	Yes	35	Yes	pneumonia
31	No	18	female	Yes	No	No	No	No	21	No	1	pancreas	285	200	No	No	No	No	Yes	No	20	No
32	No	54	male	No	Yes	No	Yes	No	23.7	Yes	2	pancreas	330	800	No	No	No	No	No	No	23	No
33	Yes	59	male	No	No	No	No	No	26.3	Yes	2	bile duct	515	1200	Yes	No	No	No	No	No	42	No
34	No	18	female	No	No	No	No	No	18	No	1	pancreas	330	400	No	No	No	No	No	No	12	No
35	No	63	female	Yes	No	Yes	No	No	21.8	No	2	duodenum	300	50	No	Yes	No	No	No	No	90	No
36	No	51	male	Yes	No	No	No	No	23.3	Yes	2	bile duct	510	1200	Yes	No	No	No	No	No	76	No
37	Yes	54	male	Yes	No	No	No	No	22.5	Yes	2	bile duct	350	700	No	No	No	No	No	No	10	No
38	No	66	female	No	Yes	Yes	Yes	No	25.3	No	2	duodenum	360	700	No	No	No	No	No	Yes	18	No
39	Yes	71	female	No	No	No	No	Yes	21	No	2	pancreas	425	1100	No	No	No	No	No	Yes	28	Yes	abdominal infection
40	Yes	58	female	No	Yes	No	No	Yes	29.7	Yes	2	bile duct	395	700	Yes	No	No	No	No	No	30	No
41	No	72	male	No	No	No	No	No	19.6	No	2	duodenum	330	300	No	No	No	No	No	No	20	No
42	Yes	65	male	Yes	No	No	No	No	25.3	Yes	2	bile duct	380	800	No	No	No	No	No	No	15	No
43	No	67	female	Yes	Yes	Yes	No	No	23	Yes	2	pancreas	330	300	No	No	No	No	No	No	16	No
44	Yes	52	male	No	Yes	Yes	No	No	21	No	2	pancreas	425	900	No	No	No	No	No	No	13	No
45	No	37	male	Yes	No	No	No	No	26.3	Yes	2	pancreas	465	800	No	Yes	No	No	Yes	No	51	No
46	No	76	male	No	No	No	No	No	23.8	No	2	pancreas	390	900	No	Yes	No	No	No	No	19	No
47	No	63	female	Yes	No	No	No	No	31.6	Yes	2	bile duct	615	600	No	No	Yes	No	No	Yes	15	No
48	No	52	male	No	Yes	No	No	No	21	No	2	duodenum	450	500	No	No	No	No	No	No	9	No
49	No	43	female	Yes	Yes	No	No	Yes	20.3	No	2	bile duct	390	200	No	No	No	Yes	No	No	22	No
50	No	55	male	No	No	No	No	No	23.4	No	3	duodenum	645	6000	No	No	No	No	No	No	10	No
51	No	67	male	No	No	No	No	No	22.9	No	2	pancreas	480	800	No	No	No	No	No	No	15	No
52	Yes	77	male	No	No	No	No	No	26.3	No	2	pancreas	365	300	Yes	No	No	No	No	Yes	14	No
53	No	64	male	Yes	Yes	No	No	No	26.4	Yes	2	pancreas	480	800	No	No	No	No	No	No	14	No
54	No	60	male	Yes	Yes	No	No	No	26.3	Yes	2	duodenum	390	800	Yes	No	No	No	No	No	14	No
55	Yes	76	male	No	No	No	No	Yes	23.4	No	3	pancreas	275	200	No	No	No	No	No	No	12	No
56	No	70	male	Yes	Yes	No	No	No	22.1	Yes	2	bile duct	345	600	No	No	No	No	No	No	18	No
57	Yes	79	female	No	Yes	No	No	Yes	15.2	No	2	duodenum	335	400	No	No	No	No	Yes	No	11	No
58	No	72	female	Yes	Yes	No	No	No	17.8	Yes	2	pancreas	375	300	No	No	No	No	No	No	11	No
59	Yes	66	male	Yes	Yes	No	No	No	25	Yes	3	pancreas	410	500	No	No	No	No	No	No	15	No
60	No	45	female	No	No	No	No	Yes	21.2	No	1	pancreas	375	500	No	No	No	No	No	No	12	No
61	No	74	female	Yes	Yes	No	No	No	19.5	Yes	2	bile duct	360	300	No	No	No	No	No	No	13	No
62	No	50	male	No	No	No	No	No	26.7	Yes	1	duodenum	450	1200	Yes	No	Yes	No	Yes	Yes	32	No
63	No	59	female	Yes	Yes	No	No	Yes	25	Yes	2	pancreas	540	800	No	No	No	No	No	No	10	No
64	No	58	male	Yes	Yes	No	No	No	24.4	Yes	2	bile duct	360	1200	No	No	No	No	No	Yes	18	No
65	No	49	female	No	Yes	No	No	Yes	18.4	No	2	pancreas	480	1500	No	No	No	No	No	No	14	No
66	No	78	female	Yes	Yes	No	No	No	24	Yes	3	pancreas	420	350	No	No	No	No	No	No	10	No
67	No	61	female	Yes	Yes	No	No	No	27.3	Yes	2	pancreas	420	800	No	No	No	No	No	No	13	No
68	No	60	male	Yes	Yes	No	No	No	19.6	No	2	duodenum	480	400	No	No	Yes	No	No	Yes	10	No
69	No	59	male	No	Yes	No	No	No	19.6	Yes	2	bile duct	540	2000	No	No	No	No	No	No	24	No
70	No	77	male	Yes	Yes	No	No	No	25.8	Yes	2	bile duct	510	1900	No	Yes	No	No	No	Yes	52	No
71	Yes	69	female	No	No	No	No	No	27.6	Yes	1	duodenum	290	600	No	No	No	No	No	No	14	No
72	No	68	female	Yes	Yes	No	No	Yes	24	Yes	2	pancreas	540	900	No	No	No	No	No	No	13	No
73	No	60	male	Yes	Yes	No	No	No	20.4	Yes	2	pancreas	420	100	No	No	No	No	No	No	9	No
74	No	67	male	No	Yes	No	No	No	23.4	Yes	2	bile duct	450	800	No	No	No	No	No	No	16	No
75	Yes	60	female	Yes	Yes	No	No	No	16.7	Yes	1	bile duct	350	1200	No	No	No	No	Yes	Yes	24	No
76	No	75	male	Yes	Yes	No	No	No	20.6	Yes	2	bile duct	330	1200	No	Yes	No	No	No	No	22	No
77	No	70	male	No	Yes	No	No	No	19.2	No	3	duodenum	480	1300	Yes	No	No	No	No	No	21	No
78	No	68	female	Yes	Yes	No	No	No	25.2	Yes	2	pancreas	360	1100	No	Yes	No	No	No	No	21	No
79	No	55	female	No	Yes	No	No	Yes	18.5	Yes	2	duodenum	300	400	No	No	No	No	No	Yes	26	No
80	Yes	60	male	Yes	Yes	No	No	No	24.8	Yes	2	bile duct	410	500	Yes	Yes	Yes	No	No	Yes	26	No
81	No	34	female	No	No	No	No	No	20.8	No	1	pancreas	690	500	No	No	No	No	No	No	12	No
82	No	63	male	Yes	Yes	No	No	No	25.9	Yes	2	bile duct	390	900	No	Yes	No	No	No	Yes	40	No
83	No	53	male	Yes	Yes	No	No	No	26	Yes	2	bile duct	540	1650	No	No	No	No	No	No	20	No
84	Yes	76	female	No	Yes	No	No	No	18.4	No	2	pancreas	500	880	Yes	Yes	No	No	Yes	Yes	47	No
85	No	70	male	Yes	Yes	No	No	No	28.3	Yes	2	duodenum	480	600	No	No	No	Yes	No	No	18	No
86	No	67	female	Yes	Yes	No	No	No	30.1	Yes	2	duodenum	300	600	No	No	No	No	Yes	Yes	18	No
87	No	62	male	Yes	Yes	No	No	No	26.6	Yes	2	bile duct	360	900	Yes	No	No	No	No	No	18	No
88	No	41	female	No	Yes	No	No	No	25.7	Yes	2	duodenum	450	200	No	No	No	No	No	No	13	No
89	No	69	male	Yes	Yes	No	No	No	21.7	Yes	3	bile duct	510	1800	No	Yes	No	No	No	No	34	No
90	No	62	male	No	No	No	No	No	24.8	No	2	duodenum	360	600	No	Yes	No	No	No	No	34	No
91	No	52	male	Yes	Yes	No	No	No	24.2	Yes	2	bile duct	480	900	No	Yes	No	No	No	No	26	No
92	No	79	female	No	No	No	No	No	24.7	No	3	duodenum	300	400	Yes	Yes	Yes	No	No	No	37	No
93	No	59	male	Yes	No	No	No	No	23.1	Yes	2	bile duct	386	300	No	Yes	No	No	No	No	22	No
94	No	53	male	No	No	No	No	No	22	Yes	2	bile duct	480	800	No	No	No	No	No	No	16	No
95	Yes	68	female	Yes	No	Yes	No	No	20.3	No	2	pancreas	415	400	No	No	No	No	No	No	16	No
96	No	75	male	Yes	No	Yes	Yes	No	24.8	Yes	2	bile duct	516	1400	No	No	No	Yes	No	No	26	No
97	Yes	50	male	Yes	No	No	No	No	20.2	Yes	2	pancreas	432	500	No	No	No	No	No	No	11	No
98	No	62	male	Yes	No	No	No	No	20.2	Yes	1	pancreas	476	1900	No	No	No	No	No	No	12	No
99	Yes	53	male	Yes	No	No	No	No	22.7	Yes	2	duodenum	390	400	No	No	No	No	No	No	16	No
100	Yes	63	female	Yes	Yes	No	No	No	23.9	Yes	2	pancreas	440	300	No	No	No	No	No	No	15	No
101	No	65	male	No	No	No	No	No	26.6	Yes	2	duodenum	353	800	No	No	No	No	No	No	14	No
102	No	53	male	No	No	Yes	No	No	26.7	No	2	duodenum	525	600	No	Yes	No	Yes	No	No	43	No
103	No	48	female	No	No	No	No	No	21.3	No	1	pancreas	330	500	No	Yes	No	No	No	No	44	No
104	Yes	76	male	No	No	Yes	No	No	22.2	No	3	pancreas	699	600	No	Yes	No	No	No	No	15	Yes	thromboembolism
105	No	60	female	No	No	Yes	No	No	25.1	No	2	pancreas	413	500	No	No	No	No	No	No	7	No
106	Yes	60	female	No	No	No	No	No	14.8	No	2	pancreas	529	1100	No	No	No	No	No	No	10	No
107	Yes	61	male	No	No	Yes	No	Yes	20.8	No	2	pancreas	477	2300	Yes	Yes	No	No	No	No	33	No
108	No	75	male	Yes	Yes	No	No	No	23.1	Yes	2	pancreas	337	300	No	No	Yes	Yes	No	No	29	Yes	intra-abdominal bleeding
109	No	77	male	No	No	Yes	Yes	No	22.1	No	3	pancreas	495	1000	No	Yes	No	No	No	No	98	No
110	Yes	60	male	Yes	No	No	No	No	19.7	Yes	2	bile duct	338	600	Yes	No	No	No	No	No	35	No
111	No	62	male	No	No	No	No	No	20.2	No	2	duodenum	363	400	No	No	No	No	No	No	13	No
112	Yes	70	female	No	No	No	No	No	25.3	Yes	1	bile duct	382	400	No	No	No	No	No	No	12	No
113	No	75	female	No	No	No	No	No	23.1	No	3	duodenum	365	1200	No	No	No	No	No	No	14	No
114	No	80	male	Yes	No	Yes	No	No	18.9	Yes	3	bile duct	364	600	No	No	No	Yes	No	No	14	Yes	gastrointestinal bleeding
115	Yes	74	male	No	Yes	Yes	No	Yes	20.9	No	2	duodenum	379	700	No	No	No	No	No	No	14	No
116	No	61	male	Yes	No	No	No	No	26	Yes	2	bile duct	453	500	Yes	No	No	No	No	No	51	No
117	Yes	70	female	No	No	Yes	No	No	28.6	No	2	pancreas	378	400	No	No	No	No	No	No	13	No
118	No	72	male	No	No	No	No	No	22.5	No	2	pancreas	604	3100	No	No	No	No	No	No	20	No
119	No	51	female	No	No	No	No	No	25.3	Yes	2	duodenum	409	700	No	No	No	No	No	No	14	No
120	No	64	male	No	Yes	No	No	No	18	No	2	duodenum	381	400	No	No	No	No	No	No	18	No
121	No	68	female	No	Yes	No	No	No	18.7	No	2	pancreas	531	1930	No	No	No	No	No	No	14	No
122	Yes	47	female	No	No	No	No	Yes	24.5	Yes	2	bile duct	591	2900	No	No	No	No	No	No	17	No
123	Yes	62	male	No	No	No	No	No	21	No	2	pancreas	327	200	No	No	No	No	No	No	18	No
124	No	76	male	Yes	No	Yes	No	No	22.9	Yes	2	bile duct	445	700	No	Yes	No	No	No	No	57	No
125	Yes	75	male	No	Yes	Yes	No	No	21.6	No	2	pancreas	484	800	No	No	No	No	No	No	14	No
126	Yes	64	female	No	No	No	No	No	21.9	Yes	2	duodenum	345	500	Yes	No	No	No	No	No	21	No
127	No	52	female	No	No	Yes	No	No	20.3	Yes	2	duodenum	282	200	No	No	No	No	No	No	14	No
128	No	53	male	No	No	Yes	No	No	24.9	No	2	pancreas	491	1300	No	No	No	No	No	No	20	No
129	No	69	female	No	No	No	No	No	23.1	Yes	1	bile duct	488	1000	No	No	No	No	No	No	14	No
130	No	55	male	Yes	No	Yes	No	No	21.3	Yes	2	pancreas	490	900	No	No	No	No	No	No	35	No
131	No	66	male	No	No	Yes	No	No	25.4	No	2	pancreas	493	1700	No	Yes	No	No	No	No	14	No
132	No	57	female	No	No	No	No	Yes	20.4	Yes	3	pancreas	362	1100	No	No	No	No	No	No	13	No
133	No	64	male	Yes	Yes	Yes	Yes	No	20.9	Yes	3	pancreas	351	1000	No	No	No	No	No	No	12	No
134	No	62	female	Yes	Yes	Yes	No	Yes	24.8	Yes	3	duodenum	465	900	No	No	No	Yes	No	No	18	No
135	No	48	female	No	No	No	No	No	23.5	No	1	duodenum	329	1000	No	No	No	No	No	No	13	No
136	No	55	male	Yes	No	No	No	No	20.3	Yes	2	bile duct	459	500	No	No	No	No	No	No	33	No
137	Yes	54	male	No	No	No	No	No	16.5	No	2	pancreas	429	1600	No	No	No	No	No	No	15	No
138	No	65	male	Yes	No	No	No	No	26.6	No	2	bile duct	305	1000	No	No	No	No	Yes	No	27	No
139	No	61	female	Yes	No	No	No	No	16.4	Yes	2	pancreas	346	200	No	No	No	No	No	No	10	No
140	No	56	female	Yes	Yes	No	No	No	22.9	Yes	2	pancreas	449	2000	No	No	No	No	No	No	19	No
141	No	73	male	Yes	Yes	Yes	No	No	21.9	Yes	3	bile duct	612	800	No	No	No	No	No	No	16	No
142	No	70	female	No	No	Yes	No	No	24.8	Yes	3	duodenum	540	1100	No	No	No	No	No	No	29	No
143	No	55	female	Yes	No	No	No	No	27.3	Yes	2	duodenum	369	100	No	Yes	No	No	No	Yes	43	No
144	No	50	male	No	No	Yes	No	No	29.4	No	2	duodenum	381	500	No	No	No	Yes	No	No	21	No
145	No	54	male	Yes	No	No	No	No	29.4	Yes	2	pancreas	375	1000	No	Yes	No	No	No	No	32	No
146	Yes	43	female	No	No	No	No	No	20.8	No	2	duodenum	399	100	No	No	No	No	No	No	23	No
147	No	78	male	No	Yes	Yes	No	No	36.8	No	3	duodenum	458	300	No	No	No	No	No	No	21	No
148	Yes	80	female	No	No	Yes	No	No	29.3	No	3	pancreas	396	500	No	No	No	No	No	No	10	No
149	No	76	male	No	No	No	No	No	22	No	2	duodenum	554	600	No	No	No	Yes	No	No	22	No
150	No	67	male	Yes	No	No	No	No	25.5	Yes	2	bile duct	570	600	No	No	No	No	No	No	17	No
151	No	50	male	No	No	No	No	No	23.5	No	1	pancreas	412	900	No	Yes	No	No	No	No	87	No
152	No	51	male	No	No	No	No	No	27.2	No	1	pancreas	692	600	No	Yes	No	No	No	No	41	No
153	No	58	female	Yes	No	No	No	No	18	Yes	2	bile duct	327	500	No	Yes	No	No	No	No	33	No
154	No	62	female	No	No	No	No	No	24.6	No	2	bile duct	591	300	No	No	No	No	No	No	19	No
155	No	57	female	No	No	No	No	No	20.3	Yes	2	duodenum	389	600	No	Yes	No	No	No	No	50	No
156	No	61	male	Yes	Yes	Yes	No	No	23.4	Yes	3	pancreas	504	1250	No	Yes	No	No	Yes	No	45	No
157	No	55	female	No	No	No	No	No	20.7	Yes	2	bile duct	470	700	No	No	No	No	No	No	12	No
158	No	67	female	Yes	Yes	Yes	No	Yes	25.7	Yes	3	pancreas	796	2000	No	No	No	Yes	No	No	7	No
159	No	65	male	Yes	No	No	No	No	19.7	Yes	2	bile duct	509	350	No	No	No	No	No	No	21	No
160	No	64	female	Yes	No	No	No	No	21.3	No	2	bile duct	380	300	No	No	No	No	No	No	26	No
161	No	51	female	Yes	No	No	No	No	24.6	Yes	1	pancreas	562	1100	No	No	No	No	No	No	15	No
162	No	72	male	No	No	Yes	No	No	21.3	No	2	bile duct	430	1800	No	Yes	No	No	No	No	56	No
163	No	29	female	No	No	No	No	No	23.6	No	2	duodenum	475	1900	No	No	No	No	No	No	12	No
164	Yes	40	male	Yes	No	No	No	No	22.6	No	3	bile duct	448	1000	No	No	No	Yes	No	No	60	No
165	No	60	male	Yes	Yes	Yes	No	No	25.9	Yes	2	pancreas	413	800	Yes	No	No	No	No	No	74	No
166	No	71	male	Yes	Yes	Yes	No	Yes	20.8	No	2	pancreas	718	1600	No	No	No	No	No	No	15	No
167	No	63	male	Yes	No	No	No	No	20.1	Yes	2	bile duct	430	700	No	No	No	No	No	No	13	No
168	No	53	male	Yes	Yes	Yes	No	Yes	22.1	Yes	3	pancreas	703	600	No	No	No	No	No	No	18	No
169	No	66	male	Yes	No	Yes	No	No	22	Yes	2	pancreas	491	600	No	No	No	No	No	No	13	No
170	No	73	female	Yes	No	No	No	No	22	Yes	3	pancreas	301	200	No	No	No	No	No	No	20	No
171	No	59	female	No	No	Yes	No	No	25.5	No	2	pancreas	506	1350	No	No	No	Yes	No	No	9	No
172	No	58	male	Yes	No	No	No	No	22.8	Yes	2	bile duct	514	1000	No	No	No	No	No	No	22	No
173	Yes	59	female	Yes	No	No	No	No	21.5	Yes	3	pancreas	548	800	No	No	No	No	No	No	17	No
174	No	55	male	No	No	No	No	No	21.5	Yes	2	pancreas	508	800	No	No	No	No	No	No	16	No
175	No	76	male	Yes	No	No	No	No	18.3	Yes	2	pancreas	375	3300	No	Yes	No	No	No	No	78	No
176	No	67	female	Yes	No	No	No	Yes	23.4	Yes	2	duodenum	630	2100	No	No	No	No	No	No	46	No
177	No	67	female	Yes	Yes	No	No	No	17.9	Yes	2	duodenum	349	200	No	No	No	No	No	No	15	No
178	Yes	61	female	No	No	No	No	No	20.8	No	2	bile duct	395	600	No	No	No	No	No	No	27	No
179	No	47	female	No	No	No	No	Yes	19.9	Yes	2	duodenum	491	1500	No	No	No	No	No	No	14	No
180	No	76	female	No	No	Yes	No	Yes	21.8	No	2	pancreas	298	1000	No	Yes	Yes	No	No	No	60	No
181	Yes	56	male	Yes	No	No	No	No	22.8	No	2	bile duct	420	800	No	No	No	No	No	Yes	18	No
182	No	49	male	Yes	No	No	No	No	24.3	Yes	2	bile duct	361	400	No	No	No	No	No	No	14	No
183	No	53	male	Yes	No	No	No	No	24.6	Yes	2	bile duct	399	200	No	No	No	Yes	No	No	15	No
184	No	67	male	No	No	No	No	No	26.6	No	2	pancreas	439	800	Yes	No	No	No	No	No	32	Yes	abdominal infection
185	No	58	male	No	No	No	No	No	23.9	No	2	duodenum	451	200	No	Yes	No	No	No	No	51	No
186	No	59	male	Yes	No	No	No	No	21.3	Yes	2	pancreas	494	1000	No	No	No	No	No	No	18	No
187	No	65	male	Yes	No	Yes	No	No	23.3	Yes	2	bile duct	515	500	No	No	No	No	No	No	11	No
188	No	69	female	No	No	Yes	Yes	No	21.8	No	3	bile duct	434	500	No	No	No	No	No	No	13	No
189	No	58	male	Yes	No	No	No	No	23.1	No	1	duodenum	360	300	No	No	No	No	No	No	27	No
190	No	57	female	Yes	No	No	No	No	19.3	Yes	2	pancreas	525	1000	No	Yes	No	No	No	No	27	No
191	Yes	61	female	Yes	No	Yes	No	No	21.6	Yes	2	bile duct	440	600	No	Yes	No	No	No	No	48	No
192	Yes	64	male	No	Yes	No	No	No	24.7	No	2	duodenum	475	500	No	No	No	No	No	No	13	No
193	No	81	male	Yes	No	Yes	No	No	18.6	Yes	2	bile duct	575	500	No	Yes	No	No	No	No	160	No
194	No	65	female	No	Yes	No	No	Yes	27	Yes	2	duodenum	578	450	No	No	No	No	No	No	25	No
195	No	57	male	No	No	No	No	Yes	19.5	No	2	duodenum	451	1600	No	No	No	No	No	No	14	No
196	No	88	male	Yes	No	No	No	No	24.2	Yes	2	bile duct	479	3000	No	No	No	No	No	No	32	No
197	No	55	male	Yes	No	Yes	No	No	22	Yes	2	duodenum	548	600	No	No	No	No	No	No	17	No
198	No	76	male	Yes	No	No	No	No	19.9	Yes	2	duodenum	501	1200	No	No	No	No	No	No	19	No
199	No	39	male	No	No	No	No	No	23.5	No	2	duodenum	260	600	No	Yes	No	No	No	No	53	No
200	Yes	68	male	No	Yes	No	No	No	26.1	No	3	duodenum	461	2500	No	No	No	No	No	No	15	No
201	No	74	male	Yes	Yes	No	No	No	20.4	No	2	pancreas	556	800	No	No	No	No	No	No	14	No
202	No	81	male	Yes	No	Yes	Yes	No	21.5	Yes	2	pancreas	380	1500	No	No	No	No	Yes	No	38	No
203	No	64	male	Yes	No	Yes	No	No	24.8	Yes	2	bile duct	424	2800	No	No	No	No	No	No	20	No
204	Yes	57	male	Yes	No	No	No	No	18	Yes	2	pancreas	508	200	No	No	No	No	No	No	17	No
205	No	51	male	Yes	No	No	No	No	22.3	No	2	pancreas	428	600	Yes	No	No	No	No	Yes	34	No
206	Yes	59	male	Yes	No	No	No	No	18.8	Yes	2	pancreas	496	400	No	No	No	Yes	Yes	No	29	No
207	No	73	female	Yes	No	Yes	No	No	20.7	Yes	2	pancreas	475	600	No	Yes	No	No	No	No	76	No
208	Yes	78	male	Yes	No	Yes	Yes	No	28	No	3	bile duct	395	1200	No	No	No	No	Yes	No	11	Yes	intra-abdominal bleeding
209	No	68	male	No	No	No	No	No	21.7	Yes	2	bile duct	412	400	No	No	No	No	No	No	13	No
210	No	69	male	No	No	Yes	No	No	22.5	No	2	duodenum	499	600	No	No	No	No	No	No	20	No
211	No	45	female	Yes	No	No	No	No	20	Yes	2	pancreas	385	400	No	No	No	No	No	No	15	No
212	No	46	male	Yes	No	No	No	No	26.7	Yes	2	bile duct	517	1600	Yes	No	No	No	No	No	33	No
213	Yes	72	female	Yes	No	Yes	No	No	28.3	Yes	2	pancreas	379	500	No	Yes	No	No	No	No	48	No
214	Yes	67	male	Yes	No	No	No	No	23.4	No	2	pancreas	500	1700	No	No	No	No	No	No	15	No
215	No	73	male	Yes	No	No	No	No	21.8	No	3	pancreas	532	500	No	No	No	No	No	No	20	No
216	No	60	male	No	Yes	Yes	No	No	22	Yes	2	duodenum	321	400	No	No	No	No	No	No	10	No
217	No	70	male	Yes	No	No	No	No	23.5	No	2	bile duct	537	700	No	No	No	No	No	No	16	No
218	No	66	male	Yes	No	No	No	No	23.4	Yes	2	bile duct	369	500	Yes	No	No	No	No	No	11	Yes	pancreatic fistula
219	Yes	62	female	No	Yes	No	No	No	24.2	No	2	duodenum	423	400	No	No	No	No	No	No	10	No
220	No	61	female	Yes	No	No	No	No	19.6	Yes	1	pancreas	474	500	No	No	No	No	No	No	12	No
221	No	66	male	Yes	No	No	No	No	22.5	Yes	2	bile duct	569	300	No	No	No	No	No	No	13	No
222	Yes	60	male	Yes	Yes	Yes	No	No	16.6	Yes	2	bile duct	475	500	No	No	No	Yes	No	No	13	No
223	No	65	male	Yes	No	No	No	No	29.4	Yes	2	bile duct	695	800	Yes	Yes	No	No	No	No	58	No
224	No	42	female	No	No	No	No	No	19.8	No	2	duodenum	501	400	No	No	No	No	No	No	18	No
225	No	69	male	No	No	Yes	No	No	25.4	No	2	bile duct	392	100	Yes	Yes	No	No	No	No	42	No
226	No	40	male	No	No	No	No	No	29.1	No	1	duodenum	337	950	No	No	No	No	No	No	12	No
227	No	64	male	Yes	No	No	No	No	25.6	Yes	1	bile duct	411	400	No	Yes	No	No	No	No	19	No
228	No	79	male	No	No	Yes	Yes	No	22.9	No	3	bile duct	305	800	No	No	No	No	No	No	37	No
229	No	55	female	No	No	No	No	No	27.1	Yes	2	duodenum	592	900	No	No	No	No	No	No	15	No
230	No	55	male	No	Yes	No	No	Yes	27.1	No	2	pancreas	336	500	No	Yes	No	No	No	No	53	No
231	Yes	63	male	Yes	No	No	No	No	23.7	Yes	1	duodenum	361	800	No	No	No	Yes	No	No	34	No
232	No	51	male	Yes	No	No	No	No	23.7	Yes	2	pancreas	341	250	No	No	No	No	No	No	14	No
233	No	67	male	Yes	No	No	No	No	22.3	Yes	2	duodenum	462	700	No	No	No	No	No	No	8	No
234	Yes	77	male	Yes	No	No	No	No	26.5	Yes	3	bile duct	437	400	No	Yes	No	No	No	No	15	No
235	No	65	female	Yes	No	Yes	No	Yes	21	Yes	2	bile duct	376	300	Yes	Yes	No	No	No	No	15	No
236	Yes	73	male	Yes	No	No	No	No	26.3	Yes	2	pancreas	540	700	No	Yes	No	No	No	No	43	No
237	No	61	male	Yes	No	No	No	No	29.4	Yes	2	bile duct	406	700	No	No	No	No	No	Yes	32	Yes	abdominal infection
238	No	68	male	No	Yes	No	No	Yes	22.9	No	2	pancreas	501	1000	No	No	No	No	No	No	26	No
239	No	55	male	Yes	No	No	No	Yes	23.7	Yes	2	bile duct	503	400	No	No	No	No	No	No	18	No
240	No	59	male	No	Yes	No	No	No	25.2	No	3	pancreas	571	600	No	Yes	No	No	No	No	49	No
241	No	69	male	No	Yes	Yes	No	Yes	30.8	Yes	3	bile duct	417	500	No	No	No	No	No	No	17	No
242	No	80	male	Yes	No	Yes	No	No	28.2	Yes	2	pancreas	422	600	No	No	No	No	No	No	14	No
243	Yes	73	male	No	Yes	Yes	No	No	24.2	No	3	bile duct	518	1500	No	No	No	No	No	No	10	No
244	No	61	female	Yes	No	No	No	Yes	23.2	Yes	2	bile duct	312	300	No	No	No	No	No	No	20	No
245	Yes	63	male	Yes	No	No	No	Yes	23.5	Yes	2	bile duct	410	700	No	No	No	No	No	No	24	No
246	No	65	female	No	No	No	No	Yes	24.7	Yes	2	pancreas	312	500	No	No	No	No	No	No	34	No
247	No	63	female	No	No	No	Yes	No	25.8	No	2	duodenum	567	950	No	No	No	No	No	No	18	No
248	No	64	male	No	No	No	No	No	22	No	2	pancreas	429	700	No	No	No	No	No	No	8	No
249	Yes	78	male	Yes	No	No	No	No	23.7	Yes	2	bile duct	401	200	Yes	No	No	No	No	Yes	38	No
250	No	41	male	Yes	Yes	Yes	No	No	27.8	Yes	2	bile duct	350	300	No	No	No	No	No	No	21	No
251	No	55	male	No	No	Yes	No	No	20.3	Yes	2	bile duct	392	800	No	No	No	No	No	No	10	No
252	No	69	male	Yes	No	Yes	No	No	18.9	Yes	2	bile duct	342	300	No	No	No	No	No	No	12	No
253	No	67	male	No	No	No	No	No	16	No	2	duodenum	301	100	No	No	No	No	Yes	No	14	No
254	Yes	56	male	Yes	No	Yes	No	No	22.7	Yes	2	pancreas	466	500	No	No	No	No	No	No	12	No
255	No	70	male	Yes	No	Yes	No	No	20.6	Yes	2	bile duct	737	400	Yes	Yes	No	No	No	No	42	No
256	No	59	male	Yes	Yes	No	Yes	No	29.4	Yes	3	bile duct	516	900	Yes	No	No	No	No	No	30	No
257	No	64	female	Yes	Yes	No	Yes	No	24.7	Yes	2	duodenum	668	300	No	No	No	No	No	No	13	No
258	Yes	62	male	Yes	No	Yes	No	No	25.4	Yes	2	pancreas	459	1500	Yes	No	No	No	No	No	55	No
259	No	57	female	Yes	No	No	No	No	26.6	No	2	pancreas	503	1100	No	No	No	No	No	No	17	No
260	No	84	female	Yes	No	Yes	No	No	18.3	Yes	2	pancreas	315	150	Yes	No	No	No	No	No	34	Yes	pneumonia
261	Yes	55	male	No	No	Yes	No	No	21.3	No	2	pancreas	410	650	No	No	No	No	No	No	14	No
262	No	81	female	Yes	No	No	No	No	25.1	No	2	bile duct	457	1400	No	No	No	No	No	No	18	No
263	No	54	male	Yes	Yes	No	No	No	21	Yes	2	pancreas	544	400	No	No	Yes	No	No	Yes	49	No
264	No	64	male	Yes	Yes	No	No	No	24.4	Yes	2	duodenum	483	300	No	No	No	No	No	No	13	No
265	No	75	female	Yes	No	No	No	No	28.1	Yes	2	pancreas	363	600	No	Yes	No	Yes	No	No	55	No
266	No	67	male	No	No	Yes	Yes	No	24.4	Yes	2	duodenum	468	400	Yes	No	No	No	No	No	31	No
267	No	66	female	No	No	No	No	No	21.6	No	2	pancreas	357	200	No	No	No	No	No	No	18	No
268	Yes	46	male	No	No	No	No	No	26.6	No	2	pancreas	422	200	No	No	No	No	No	No	12	No
269	No	68	male	No	No	Yes	No	Yes	21.9	Yes	2	bile duct	485	1100	No	No	No	No	No	No	25	No
270	No	53	female	Yes	No	No	No	No	20.2	Yes	1	pancreas	361	400	No	No	No	No	No	No	12	No
271	Yes	89	male	No	No	No	No	No	16.3	No	3	duodenum	448	1000	No	No	No	No	No	No	26	No
272	No	83	male	Yes	No	Yes	No	No	23.7	No	3	bile duct	502	4700	No	No	No	No	No	No	17	Yes	pneumonia
273	No	46	female	Yes	No	No	No	No	21.9	Yes	2	pancreas	373	950	No	No	No	No	No	No	17	No
274	Yes	64	male	Yes	No	Yes	No	No	21.8	Yes	2	bile duct	362	650	No	No	No	No	No	No	10	No
275	Yes	65	female	Yes	No	Yes	No	No	29.3	Yes	2	pancreas	349	400	Yes	No	No	No	No	Yes	23	Yes	abdominal infection
276	No	84	male	No	No	Yes	No	No	24	Yes	2	pancreas	447	1500	No	No	Yes	No	No	No	29	No
277	No	40	male	Yes	No	No	No	No	17.7	No	2	pancreas	367	200	No	No	No	No	No	No	12	No
278	No	67	male	Yes	No	No	No	No	24.6	Yes	2	bile duct	586	500	No	Yes	No	No	No	No	61	No
279	No	32	female	No	No	No	No	Yes	19.3	No	2	bile duct	447	1350	No	No	No	No	Yes	No	11	No
280	Yes	59	male	Yes	No	No	No	No	30.8	Yes	2	bile duct	391	500	No	No	No	No	No	No	18	No
281	No	54	female	Yes	No	No	No	No	21.3	Yes	2	pancreas	576	600	No	No	No	No	No	No	39	No
282	Yes	52	male	No	No	Yes	No	No	21.3	No	2	duodenum	334	400	No	No	No	No	No	No	15	No
283	No	73	male	No	Yes	Yes	Yes	No	22.9	No	2	pancreas	370	500	No	Yes	No	No	No	No	109	No
284	No	64	male	Yes	No	No	No	No	23.7	No	2	pancreas	428	800	Yes	No	No	No	No	No	8	Yes	pancreatic fistula
285	Yes	82	female	No	No	Yes	Yes	No	19.4	No	2	pancreas	597	1800	No	No	No	No	No	No	13	No
286	No	61	male	No	No	No	No	No	21.8	No	2	duodenum	717	400	No	No	No	No	No	No	9	No
287	Yes	59	female	Yes	Yes	No	No	No	21.6	Yes	2	pancreas	397	470	No	No	No	No	No	No	13	No
288	No	78	male	Yes	No	Yes	No	No	20.4	Yes	2	bile duct	420	800	No	No	No	No	No	No	32	No
289	No	14	female	No	No	No	No	No	21.8	No	1	pancreas	355	100	No	No	No	Yes	No	No	10	No
290	Yes	78	male	Yes	Yes	Yes	No	Yes	19.9	Yes	3	bile duct	360	700	No	No	No	No	No	No	28	No
291	No	77	male	Yes	No	Yes	Yes	No	22.5	Yes	2	bile duct	383	600	No	No	No	No	No	No	25	No
292	No	66	male	Yes	No	Yes	No	No	21	Yes	2	duodenum	372	1200	No	No	No	Yes	No	No	25	No
293	Yes	60	female	Yes	No	No	No	Yes	24	Yes	2	pancreas	423	1000	No	No	No	No	No	No	14	No
294	No	60	male	No	No	Yes	No	No	24.9	Yes	3	duodenum	306	400	Yes	No	No	No	No	No	31	No
295	Yes	76	male	Yes	No	No	No	No	24.2	Yes	2	pancreas	414	1000	No	No	No	No	No	No	19	No
296	No	67	female	No	No	Yes	No	No	29.7	No	2	duodenum	362	700	Yes	No	No	No	No	Yes	12	No
297	No	61	male	Yes	No	No	Yes	No	22.4	Yes	2	bile duct	389	300	No	Yes	No	Yes	No	No	40	No
298	No	71	male	Yes	No	No	No	Yes	19.9	Yes	2	bile duct	316	300	No	No	No	No	No	No	20	No
299	No	72	male	No	Yes	Yes	Yes	Yes	23.8	Yes	2	bile duct	475	1100	No	No	No	No	No	No	26	No
300	No	60	male	Yes	No	Yes	No	No	32.2	Yes	2	bile duct	393	900	No	No	No	Yes	No	No	13	No
301	No	66	female	No	No	No	No	No	20.4	Yes	3	bile duct	445	300	No	Yes	No	No	No	No	35	No
302	No	77	male	Yes	No	No	No	No	16.9	Yes	2	bile duct	429	400	No	No	No	No	No	No	8	No
303	Yes	65	female	Yes	Yes	No	No	No	21.6	Yes	2	pancreas	440	600	No	No	No	No	No	No	16	No
304	No	71	male	Yes	Yes	Yes	No	No	21.7	Yes	2	duodenum	407	800	No	No	No	No	No	No	8	No
305	No	77	female	Yes	No	Yes	No	No	22.3	Yes	2	bile duct	360	150	Yes	No	No	No	No	No	48	No
306	No	70	female	Yes	No	No	No	No	20.4	Yes	3	pancreas	294	600	No	No	No	Yes	No	No	21	No
307	No	62	male	Yes	Yes	Yes	No	No	23.1	Yes	3	bile duct	580	600	No	No	No	No	No	No	11	No
308	No	32	female	No	No	No	No	No	19	No	2	pancreas	356	400	No	No	No	No	No	No	15	No
309	No	60	male	Yes	Yes	No	No	No	25.2	Yes	1	bile duct	465	600	Yes	Yes	No	No	No	Yes	32	No
310	No	83	male	Yes	No	No	No	No	25.2	Yes	2	pancreas	355	300	No	No	No	No	No	No	13	No
311	No	77	female	Yes	No	No	No	No	20.7	No	3	duodenum	266	500	No	No	Yes	No	No	No	26	No
312	No	62	female	No	No	Yes	No	No	23	Yes	2	pancreas	403	300	No	No	No	No	No	No	18	No
313	Yes	72	male	Yes	Yes	Yes	No	No	22.8	Yes	2	bile duct	327	150	No	No	No	No	No	No	12	No
314	No	56	female	No	No	No	No	No	23.9	No	1	pancreas	425	650	No	No	No	No	No	No	13	No
315	Yes	64	female	No	No	No	No	No	20.4	No	2	duodenum	345	1000	No	No	No	No	No	No	12	No
316	Yes	57	male	No	No	Yes	No	No	26.3	No	2	pancreas	518	800	No	No	No	No	No	No	13	No
317	Yes	72	male	Yes	No	No	Yes	No	22	Yes	3	bile duct	415	1000	No	No	No	No	No	No	15	No
318	No	73	female	No	No	Yes	No	No	22.9	No	2	bile duct	448	1300	No	No	No	No	No	No	18	No
319	No	68	male	Yes	Yes	Yes	No	No	24.8	Yes	2	bile duct	534	700	No	No	No	No	No	No	23	No
320	No	68	male	No	No	Yes	No	No	23.9	Yes	2	pancreas	400	400	No	No	No	No	No	No	13	No
321	No	62	female	No	No	Yes	Yes	No	25	No	3	pancreas	379	200	No	Yes	No	No	No	No	47	No
322	No	56	male	Yes	No	No	No	No	18.8	Yes	2	bile duct	395	400	No	No	No	No	No	No	12	No
323	No	61	male	Yes	No	No	No	No	24.9	Yes	2	pancreas	480	1000	No	Yes	No	Yes	Yes	No	52	No
324	No	70	male	No	No	No	No	No	18	No	2	duodenum	610	1200	No	No	No	No	No	No	10	No
325	Yes	66	female	No	No	No	No	No	22.2	Yes	2	bile duct	720	3200	No	No	No	No	No	No	13	No
326	Yes	55	male	No	No	No	No	No	25.2	No	2	pancreas	465	700	Yes	No	No	No	No	Yes	23	No
327	Yes	72	female	Yes	No	Yes	No	Yes	22.7	Yes	3	pancreas	380	800	No	No	No	No	No	No	7	Yes	pneumonia
328	Yes	43	female	No	No	No	No	Yes	19.6	No	2	pancreas	370	500	No	No	No	No	No	No	13	No
329	No	60	male	Yes	No	No	No	No	23	Yes	2	pancreas	360	800	No	No	No	No	No	No	15	No
330	No	39	male	Yes	No	No	No	No	18.1	Yes	2	duodenum	660	500	No	No	No	No	No	No	23	No
331	No	75	male	Yes	No	No	No	No	17.3	Yes	3	duodenum	425	300	No	No	No	No	No	No	13	No
332	No	67	female	No	No	No	No	Yes	26	Yes	2	duodenum	580	510	No	No	No	No	No	No	11	No
333	No	64	male	Yes	No	Yes	No	Yes	24.7	Yes	3	pancreas	330	100	No	No	No	No	No	No	12	No
334	No	71	male	Yes	No	Yes	No	No	30.5	Yes	2	bile duct	500	800	No	No	No	No	No	No	18	No
335	No	67	male	Yes	No	No	No	No	22	Yes	3	bile duct	390	1100	Yes	Yes	No	Yes	Yes	No	67	No
336	No	75	female	No	No	No	No	No	22.1	Yes	2	bile duct	630	700	No	No	No	No	No	No	21	No
337	No	55	male	Yes	No	No	No	No	22.8	Yes	2	pancreas	560	600	No	No	No	No	No	No	13	No
338	No	58	male	No	No	Yes	Yes	No	27.7	No	3	bile duct	490	1050	No	Yes	No	No	No	No	38	No
339	No	41	female	No	No	No	No	No	17.3	Yes	2	duodenum	540	400	No	No	No	No	No	No	25	No
340	No	58	male	No	Yes	No	No	No	22.8	Yes	2	bile duct	440	400	No	No	No	No	No	Yes	25	No
341	No	68	female	No	No	No	No	Yes	20.5	Yes	2	bile duct	510	400	No	No	No	No	No	No	13	No
342	Yes	61	male	Yes	No	No	No	No	18.6	Yes	3	pancreas	410	400	No	No	No	No	No	No	11	No
343	No	69	female	Yes	Yes	Yes	No	Yes	21.5	Yes	2	pancreas	600	500	No	No	No	No	No	No	32	No
344	Yes	59	male	Yes	No	Yes	No	No	20.2	Yes	2	bile duct	530	500	No	No	No	No	No	No	13	No
345	No	36	female	Yes	No	No	No	No	19.9	Yes	2	bile duct	630	200	No	No	No	No	No	No	20	No
346	No	58	male	Yes	No	No	No	No	21.5	Yes	2	bile duct	300	1600	No	No	No	No	No	No	20	No
347	Yes	50	male	Yes	Yes	Yes	No	No	24.7	Yes	2	pancreas	365	250	No	No	No	No	No	No	10	No
348	No	57	male	No	No	No	No	No	23.8	Yes	2	duodenum	390	650	No	Yes	No	No	No	No	37	No
349	No	60	male	No	No	No	No	No	26	Yes	3	bile duct	530	2000	No	No	No	No	No	No	15	No
350	No	71	male	No	No	Yes	Yes	No	24.1	Yes	3	pancreas	500	700	No	No	No	No	No	No	15	No
351	No	30	female	No	No	No	No	No	21.8	No	1	pancreas	375	200	No	Yes	No	No	No	No	50	No
352	No	60	male	No	No	Yes	No	No	26.2	No	2	bile duct	540	500	No	No	No	No	No	No	15	No
353	Yes	66	male	Yes	No	No	No	No	20.2	Yes	2	duodenum	480	1200	No	No	No	No	No	No	14	No
354	No	66	female	No	No	Yes	No	Yes	24	No	2	bile duct	540	700	No	No	No	No	No	No	12	No
355	No	66	female	No	Yes	Yes	No	No	22.2	No	2	duodenum	555	750	No	No	No	No	No	No	14	No
356	No	65	female	Yes	No	No	No	No	20.8	Yes	2	bile duct	450	600	No	No	No	No	No	No	23	No
357	No	53	male	Yes	No	No	No	No	21.5	Yes	2	duodenum	420	600	No	No	No	No	No	No	14	No
358	Yes	79	male	Yes	No	No	No	No	17.3	Yes	2	pancreas	340	700	No	No	No	No	No	No	16	No
359	Yes	71	male	No	No	No	No	No	19	No	3	bile duct	1160	1000	No	No	No	No	No	No	13	No
360	No	76	female	Yes	Yes	Yes	No	Yes	23.1	Yes	3	pancreas	360	260	No	No	No	No	No	No	10	No
361	No	65	male	Yes	No	No	No	No	25.5	Yes	2	bile duct	510	700	Yes	Yes	No	No	Yes	No	63	No
362	No	66	male	Yes	Yes	Yes	No	No	28.1	Yes	3	duodenum	590	500	No	No	No	No	No	No	30	No
363	No	69	male	Yes	No	Yes	No	No	32.7	Yes	2	bile duct	480	1000	Yes	Yes	No	No	No	Yes	62	No
364	No	53	female	Yes	No	Yes	No	No	27.8	Yes	2	bile duct	600	890	No	Yes	No	No	No	No	63	No
365	Yes	81	male	No	No	No	No	No	28.7	Yes	2	bile duct	500	1800	No	No	No	No	No	No	11	No
366	No	72	male	Yes	No	No	No	No	17	Yes	3	duodenum	340	220	No	No	No	No	No	No	9	No
367	No	37	female	No	No	No	No	No	33.7	Yes	2	duodenum	20	600	No	No	No	No	No	No	16	No
368	Yes	55	female	Yes	Yes	No	No	No	22	Yes	2	duodenum	395	500	No	No	No	No	No	No	11	No
369	No	46	male	Yes	No	Yes	No	No	24.9	Yes	2	pancreas	540	750	No	No	No	No	No	No	17	No
370	No	72	female	Yes	Yes	Yes	No	No	21	Yes	2	pancreas	360	400	No	No	No	No	No	No	25	No
371	No	65	male	Yes	No	Yes	No	No	29.4	Yes	3	bile duct	555	1500	No	No	No	No	No	No	7	No
372	No	62	male	No	No	No	Yes	No	27.5	Yes	2	duodenum	510	600	Yes	No	No	No	No	No	37	No
373	Yes	71	male	No	No	Yes	Yes	No	27.1	Yes	2	bile duct	520	1000	Yes	No	No	No	No	No	81	No
374	No	61	male	No	No	No	No	No	23.1	Yes	2	bile duct	680	2000	No	No	No	No	No	No	13	No
375	No	65	female	No	No	No	No	No	20.5	No	2	pancreas	440	300	No	No	No	No	No	No	14	No
376	No	68	female	No	No	No	No	No	20	No	2	duodenum	320	1000	No	No	No	No	No	No	9	No
377	Yes	64	female	Yes	Yes	No	No	No	19.5	Yes	3	bile duct	355	300	No	No	No	No	No	No	11	No
378	No	64	male	No	No	No	No	No	27.5	No	2	duodenum	590	850	Yes	No	No	No	No	No	27	No
379	No	77	male	No	No	Yes	Yes	No	25.5	No	2	bile duct	560	400	No	No	No	No	No	No	14	No
380	No	63	male	Yes	No	No	No	No	19	Yes	2	bile duct	400	1300	No	No	No	No	No	No	9	No
381	No	65	male	No	No	No	No	No	26	No	2	bile duct	390	1300	No	No	No	No	No	No	19	No
382	No	66	female	No	No	No	No	No	22.7	Yes	2	pancreas	330	400	No	No	No	No	No	No	18	No
383	No	73	female	Yes	Yes	Yes	No	No	23.8	Yes	2	pancreas	301	1010	Yes	No	No	No	No	No	23	No
384	No	59	female	Yes	No	Yes	No	No	28.7	Yes	2	duodenum	343	400	No	No	No	No	No	No	11	No
385	No	69	male	No	Yes	Yes	No	No	22.5	Yes	2	pancreas	326	600	No	No	No	No	No	No	12	No
386	No	77	female	Yes	Yes	Yes	No	No	22.2	Yes	3	pancreas	372	900	No	No	No	No	No	No	15	No
387	No	68	male	Yes	No	Yes	No	No	25.5	Yes	3	pancreas	699	1100	Yes	No	No	Yes	Yes	Yes	118	Yes	gastrointestinal bleeding
388	Yes	47	female	Yes	No	No	No	No	26.7	Yes	2	duodenum	406	250	No	No	No	No	No	No	13	No
389	No	77	male	No	No	Yes	No	No	27.3	Yes	2	duodenum	383	300	No	No	No	No	No	No	15	No
390	No	69	female	Yes	Yes	Yes	No	Yes	20.5	Yes	2	duodenum	370	1100	No	No	No	No	No	No	13	No
391	No	60	female	Yes	No	No	No	No	22.1	Yes	2	pancreas	1857	100	No	No	No	No	No	No	21	No
392	Yes	84	male	Yes	No	No	No	No	21.3	Yes	2	pancreas	609	950	No	No	No	No	No	No	15	No
393	No	68	female	No	No	Yes	No	No	23.8	No	2	pancreas	351	300	No	No	No	No	No	No	19	No
394	No	48	female	No	No	No	No	Yes	14.5	No	2	pancreas	282	150	No	No	No	No	No	No	10	No
395	No	68	male	Yes	Yes	No	No	No	24.5	Yes	2	pancreas	407	200	No	No	No	No	No	No	10	No
396	No	57	male	Yes	No	No	No	No	25.3	Yes	2	bile duct	362	1000	No	No	No	No	No	No	11	No
397	No	72	male	Yes	No	Yes	No	No	23.1	Yes	2	bile duct	526	300	Yes	No	No	No	No	No	21	No
398	No	56	male	No	No	No	No	No	21.3	Yes	2	bile duct	619	1400	No	No	No	No	No	No	10	No
399	No	52	male	No	No	Yes	No	No	22.6	No	2	bile duct	380	600	No	No	No	No	Yes	No	21	No
400	No	57	male	Yes	No	No	No	No	27	Yes	2	bile duct	395	800	Yes	Yes	No	No	No	No	51	No
401	No	53	male	No	Yes	Yes	No	No	24.7	No	3	pancreas	490	800	No	No	No	No	No	No	11	No
402	No	53	female	No	No	No	No	No	23.4	No	2	bile duct	287	500	Yes	No	No	No	No	No	20	No
403	No	64	male	No	Yes	Yes	No	No	24.2	Yes	2	bile duct	495	700	No	No	No	No	No	No	27	No
404	No	65	female	Yes	No	No	No	No	19.3	Yes	3	pancreas	593	500	No	No	No	No	No	No	13	No
405	No	69	male	Yes	Yes	Yes	No	No	22.9	Yes	2	pancreas	361	800	No	No	No	No	No	No	9	No
406	Yes	56	female	No	No	Yes	No	No	24.7	No	2	pancreas	316	300	No	No	No	No	No	No	13	No
407	No	67	female	No	Yes	Yes	No	No	28	No	2	bile duct	495	400	No	No	No	No	No	No	11	No
408	No	60	male	Yes	No	No	No	No	26.7	Yes	3	bile duct	383	500	No	No	No	No	No	No	13	No
409	No	71	female	Yes	No	Yes	No	No	19.6	Yes	2	duodenum	394	200	No	No	No	No	No	No	25	No
410	No	65	male	Yes	Yes	No	No	No	20.2	Yes	2	duodenum	306	600	No	No	No	No	No	No	24	No
411	Yes	45	male	No	No	No	No	No	15.4	No	2	pancreas	334	200	No	No	No	No	No	No	10	No
412	No	58	male	No	No	Yes	No	No	27.6	No	2	pancreas	322	750	Yes	No	No	No	No	No	45	No
413	No	69	female	No	No	No	No	No	23.6	No	2	duodenum	353	1000	No	No	No	No	No	No	23	No
414	No	70	male	No	No	No	No	No	26.6	No	2	pancreas	390	800	No	No	No	No	No	No	19	No
415	No	66	female	No	No	Yes	No	Yes	19	Yes	2	pancreas	367	450	No	No	No	No	No	No	11	No
416	Yes	68	male	Yes	No	No	No	No	22.5	Yes	2	bile duct	367	400	No	No	No	No	No	No	13	No
417	No	69	male	Yes	Yes	No	No	No	19.9	Yes	2	pancreas	360	800	No	No	No	No	No	No	10	No
418	No	67	female	No	No	No	No	No	24	No	2	pancreas	383	500	No	No	No	No	No	No	11	No
419	No	66	male	No	No	No	No	No	23.5	No	2	bile duct	288	150	No	No	No	No	No	No	15	No
420	No	65	female	Yes	No	No	No	No	19.1	Yes	2	pancreas	312	300	No	Yes	No	No	No	No	41	No
421	No	58	female	No	No	No	No	No	22.9	No	2	pancreas	374	550	No	No	No	Yes	No	No	31	No
422	No	65	male	Yes	No	No	No	No	24.3	No	2	bile duct	457	900	Yes	Yes	No	No	No	No	63	No
423	No	67	male	No	No	No	No	No	18.5	Yes	2	bile duct	338	400	No	No	No	No	No	No	11	No
424	No	67	female	Yes	No	No	No	Yes	22.9	Yes	2	duodenum	389	550	Yes	No	Yes	No	No	No	50	No
425	No	54	male	Yes	No	Yes	No	No	20.8	Yes	2	bile duct	335	100	Yes	No	No	No	No	Yes	46	No
426	Yes	71	male	No	No	No	No	No	26.2	Yes	2	bile duct	412	800	No	No	No	No	No	No	16	No
427	No	64	male	Yes	No	Yes	No	No	23.5	No	2	bile duct	288	300	No	No	No	No	No	No	13	No
428	Yes	55	male	No	No	No	No	No	23	No	2	pancreas	369	500	No	No	Yes	No	No	Yes	73	No
429	No	66	male	Yes	No	No	No	No	17.6	Yes	2	duodenum	254	200	Yes	No	No	No	No	No	27	No
430	No	56	male	Yes	No	No	No	No	23.7	Yes	2	bile duct	425	700	No	No	No	No	No	No	17	No
431	No	75	female	No	No	No	No	No	18.4	No	2	pancreas	451	400	No	No	No	No	No	No	15	No
432	No	60	female	Yes	No	No	No	No	23.7	Yes	2	pancreas	490	800	No	No	No	No	No	No	12	No
433	No	71	male	No	No	No	Yes	No	16.3	Yes	3	bile duct	335	300	No	No	No	No	No	Yes	21	No
434	Yes	58	male	No	Yes	No	No	Yes	21.7	No	2	bile duct	478	1400	No	No	No	No	No	No	12	No
435	No	64	male	Yes	No	No	No	No	21.3	Yes	2	pancreas	348	300	No	No	No	No	Yes	No	27	No
436	Yes	66	male	Yes	No	No	No	No	24	Yes	2	bile duct	351	350	Yes	No	No	No	Yes	Yes	27	No
437	No	66	female	Yes	Yes	Yes	No	No	28	Yes	2	bile duct	380	450	No	No	No	No	No	No	20	No
438	Yes	52	female	Yes	No	No	No	Yes	21.8	Yes	2	pancreas	473	600	No	No	No	No	No	No	10	No
439	No	73	male	Yes	No	Yes	No	No	23.5	Yes	2	bile duct	386	500	No	No	No	No	No	No	10	No
440	No	67	female	Yes	No	No	No	No	18.4	Yes	2	bile duct	532	180	No	No	No	No	No	No	10	No
441	No	69	female	Yes	No	No	No	No	25.8	Yes	2	pancreas	365	300	Yes	No	No	No	No	No	26	No
442	No	66	male	Yes	Yes	No	No	No	19.6	Yes	3	pancreas	442	400	No	Yes	No	No	No	No	37	No
443	No	71	male	No	No	Yes	No	No	25.4	Yes	2	bile duct	350	400	No	No	No	No	No	No	9	No
444	No	50	male	No	Yes	No	No	No	24.9	No	2	pancreas	461	800	No	No	No	No	No	No	11	No
445	No	68	male	Yes	No	No	No	No	28	Yes	2	duodenum	483	400	No	No	No	No	No	No	12	No
446	No	69	male	Yes	No	No	No	No	26.6	Yes	2	bile duct	465	900	No	No	No	No	No	No	27	No
447	No	64	male	No	Yes	No	No	No	18.5	No	3	pancreas	724	3500	No	No	No	No	No	No	12	No
448	No	61	male	Yes	Yes	Yes	No	Yes	26.6	Yes	2	bile duct	360	900	No	No	No	No	No	No	12	No
449	No	49	male	No	Yes	No	No	No	25.2	No	2	pancreas	471	1150	No	No	No	No	No	Yes	20	No
450	No	65	female	No	Yes	No	Yes	No	22.8	No	2	duodenum	294	250	No	No	No	No	No	No	12	No
451	No	69	female	No	No	No	No	Yes	20.4	Yes	2	bile duct	365	660	No	Yes	No	No	No	No	38	No
452	No	67	male	Yes	No	No	No	No	22	Yes	2	pancreas	448	900	No	No	Yes	No	No	Yes	43	No
453	No	61	male	Yes	No	No	No	No	22.6	Yes	2	pancreas	337	600	No	No	No	No	No	No	7	No
454	Yes	58	female	No	No	No	No	No	16.8	Yes	2	duodenum	318	400	No	No	No	No	No	No	10	No
455	No	73	female	Yes	No	No	No	No	21.6	Yes	2	duodenum	369	500	No	No	No	No	No	No	8	No
456	No	76	female	No	No	No	No	No	23.5	No	2	duodenum	371	800	No	No	Yes	No	Yes	Yes	110	No
457	No	59	male	Yes	No	Yes	No	No	24.2	Yes	2	pancreas	548	1300	Yes	Yes	No	No	No	No	45	No
458	No	80	female	No	Yes	Yes	No	No	25.6	Yes	3	duodenum	360	1200	No	No	No	No	No	No	12	No
459	No	74	male	Yes	No	Yes	No	No	25.2	Yes	2	bile duct	395	200	Yes	No	No	No	No	No	19	No
460	No	61	female	No	Yes	Yes	No	No	19.1	Yes	2	pancreas	448	300	No	No	No	Yes	No	No	19	No
461	No	52	male	Yes	No	Yes	No	No	26.4	Yes	3	bile duct	564	1200	Yes	Yes	No	No	Yes	No	42	No
462	No	43	female	No	No	No	No	No	27.2	Yes	2	duodenum	403	50	Yes	No	No	No	No	No	41	No
463	No	61	male	No	No	Yes	No	No	22.1	Yes	2	bile duct	407	500	Yes	No	No	No	Yes	No	65	No
464	Yes	61	female	Yes	Yes	Yes	No	No	20.9	Yes	2	pancreas	386	200	No	No	No	No	No	No	17	No
465	No	63	male	Yes	No	No	No	No	23.2	No	2	bile duct	358	300	No	No	No	No	No	No	11	No
466	Yes	66	male	Yes	No	No	No	Yes	23.2	Yes	2	bile duct	435	200	Yes	Yes	No	Yes	No	No	28	No
467	Yes	68	male	No	No	No	No	No	22.4	Yes	2	pancreas	563	2550	No	No	No	No	No	No	20	No
468	No	57	male	No	No	No	No	No	24.2	Yes	2	duodenum	332	200	No	No	No	No	No	No	12	No
469	No	69	male	Yes	Yes	No	No	No	27.3	Yes	2	pancreas	350	400	No	Yes	No	Yes	No	No	35	No
470	Yes	75	female	Yes	Yes	Yes	No	No	24.3	Yes	3	pancreas	373	400	No	No	No	No	No	No	18	No
471	No	74	male	Yes	Yes	Yes	No	No	20.2	Yes	2	bile duct	511	460	No	No	No	No	No	No	16	No
472	No	56	female	No	No	No	No	No	25.5	No	2	duodenum	389	300	No	No	No	No	No	No	12	No
473	Yes	70	male	No	No	Yes	No	Yes	22.9	No	3	bile duct	428	800	No	No	No	No	No	No	22	No
474	Yes	57	female	Yes	No	No	No	No	25	Yes	1	pancreas	370	150	No	No	No	No	No	No	10	No
475	No	54	female	Yes	No	No	No	No	25.8	Yes	2	pancreas	332	1150	No	No	No	No	No	No	27	No
476	Yes	79	male	Yes	No	Yes	No	No	27.7	Yes	2	bile duct	404	300	Yes	No	No	No	No	No	90	No
477	Yes	60	female	Yes	No	No	No	No	21.2	Yes	3	pancreas	383	300	No	No	No	No	No	No	12	Yes	biliary fistula
478	No	55	female	No	Yes	Yes	No	Yes	23	Yes	2	pancreas	373	1700	No	No	No	No	No	No	12	No
479	No	74	male	No	No	No	No	No	18.2	No	2	pancreas	423	550	No	No	No	No	No	No	20	No
480	No	71	male	Yes	No	No	No	No	23.2	Yes	2	pancreas	395	400	No	No	No	Yes	No	Yes	37	No
481	No	63	male	No	No	No	No	Yes	16.1	No	2	pancreas	560	300	No	No	No	No	No	No	15	No
482	No	67	male	No	No	Yes	No	No	20.1	No	3	duodenum	518	2000	No	No	No	Yes	No	No	15	Yes	gastrointestinal bleeding
483	No	75	male	Yes	No	No	No	No	27	Yes	2	bile duct	400	350	Yes	No	No	No	Yes	Yes	10	Yes	pancreatic fistula
484	No	52	male	Yes	Yes	No	No	No	29.3	Yes	2	pancreas	487	300	No	No	No	No	No	No	26	No
485	No	76	male	No	Yes	Yes	No	Yes	26	Yes	2	pancreas	503	450	No	No	No	No	No	No	16	No
486	Yes	83	male	Yes	No	No	No	No	24.5	Yes	3	bile duct	399	300	Yes	No	No	No	No	Yes	46	No
487	No	64	female	No	Yes	Yes	No	No	21.4	Yes	3	bile duct	444	200	No	Yes	No	No	No	No	77	No
488	Yes	62	male	Yes	No	No	No	No	24.7	Yes	3	pancreas	415	350	No	Yes	No	No	No	No	28	No
489	No	52	male	Yes	No	No	No	No	24.5	Yes	2	bile duct	463	1200	Yes	No	No	No	Yes	No	23	Yes	pancreatic fistula
490	No	53	female	No	No	Yes	No	Yes	33.1	Yes	3	bile duct	426	400	Yes	Yes	No	No	No	No	60	No
491	No	64	female	Yes	No	No	No	No	22.3	Yes	2	pancreas	384	900	No	No	No	No	No	No	15	No
492	No	69	female	Yes	No	No	No	No	19.5	Yes	2	bile duct	390	1200	Yes	No	No	No	No	No	22	No
493	Yes	56	male	No	No	No	No	No	22.9	Yes	2	bile duct	338	400	Yes	No	No	No	No	No	17	No
